# Supplementary material for: Systemic Effects of Radiotherapy and Concurrent Chemo-Radiotherapy in Head and Neck Cancer Patients—Comparison of Serum Metabolome Profiles
Source: Metabolites. 2020 Feb 7;10(2):60. doi: 10.3390/metabo10020060 (PMC7074210; doi:10.3390/metabo10020060)
Supplement: Supplementary file 1 [file metabolites-10-00060-s001.xlsx]

## Sheet: Table S1
Table S1. Complete list of lipids present in lipid isomer groups that showed differences between groups of patients (Table 1 in the manuscript body)
AbsoluteIDQ® p180 Kit lipid annotation	Potential isomer	Database ID
Acylcarnitines
C0	Carnitine	CHEBI:17126
C16	(5Z)-13-Carboxytridec-5-enoylcarnitine	LMFA07070018
	Palmitoylcarnitine	LMFA07070004
	L-Palmitoylcarnitine	LMFA07070079
	O-Palmitoylcarnitine	LMFA07070098
C18:1	Elaidiccarnitine	LMFA07070063
	O-Oleoylcarnitine	LMFA07070096
Glycerophospholipids
lysoPC a C16:0	PC(O-14:0/2:0)	LMGP01020019
	PC(16:0/0:0)	LMGP01050018
	PC(0:0/16:0)	LMGP01050074
	PC(16:0/0:0)[rac]	LMGP01050113
lysoPC a C16:1	PC(16:1(9E)/0:0)	LMGP01050021
	PC(16:1(9Z)/0:0)	LMGP01050022
	PC(P-17:0/0:0)	LMGP01070007
lysoPC a C18:0	PC(O-16:0/2:0)	LMGP01020046
	PC(18:0/0:0)	LMGP01050026
	PC(0:0/18:0)	LMGP01050076
lysoPC a C18:1	PC(18:1(6Z)/0:0)	LMGP01050029
	PC(18:1(9E)/0:0)	LMGP01050030
	PC(18:1(9Z)/0:0)	LMGP01050032
	PC(0:0/18:1(6Z))	LMGP01050079
	PC(0:0/18:1(9E))	LMGP01050080
	PC(0:0/18:1(9Z))	LMGP01050082
	PC(18:1(9Z)/0:0)[rac]	LMGP01050114
	LysoPC(18:1(11Z))	LMGP01050138
lysoPC a C18:2	PC(18:2(2E,4E)/0:0)	LMGP01050034
	PC(18:2(9Z,12Z)/0:0)	LMGP01050035
lysoPC a C20:3	PC(20:3(8Z,11Z,14Z)/0:0)	LMGP01050133
	LysoPC(20:3(5Z,8Z,11Z))	LMGP01050139
lysoPC a C20:4	PC(20:4(5Z,8Z,11Z,14Z)/0:0)	LMGP01050048
	PC(0:0/20:4(5Z,8Z,11Z,14Z))	LMGP01050121
	LysoPC(20:4(8Z,11Z,14Z,17Z))	LMGP01050140
PC aa C32:0	PC(10:0/22:0)	LMGP01010397
	PC(11:0/21:0)	LMGP01010418
	PC(12:0/20:0)	LMGP01010444
	PC(13:0/19:0)	LMGP01010463
	PC(14:0/18:0)	LMGP01010488
	PC(15:0/17:0)	LMGP01010537
	PC(16:0/16:0)	LMGP01010564
	PC(17:0/15:0)	LMGP01010704
	PC(18:0/14:0)	LMGP01010739
	PC(19:0/13:0)	LMGP01010970
	PC(20:0/12:0)	LMGP01010997
	PC(21:0/11:0)	LMGP01011062
	PC(22:0/10:0)	LMGP01011080
	PC(9:0/23:0)	LMGP01011267
	PC(O-16:0/17:0)	LMGP01020031
	PC(O-18:0/15:0)	LMGP01020197
	PC(O-20:0/13:0)	LMGP01020217
PC aa C32:1	PC(14:0/18:1(11Z))	LMGP01010490
	PC(14:0/18:1(9Z))	LMGP01010492
	PC(16:0/16:1(9Z))	LMGP01010566
	PC(18:1(9Z)/14:0)	LMGP01010882
	PC(12:0/20:1(11Z))	LMGP01011329
	PC(13:0/19:1(9Z))	LMGP01011352
	PC(14:1(9Z)/18:0)	LMGP01011389
	PC(15:0/17:1(9Z))	LMGP01011413
	PC(15:1(9Z)/17:0)	LMGP01011439
	PC(16:1(9Z)/16:0)	LMGP01011479
	PC(17:0/15:1(9Z))	LMGP01011500
	PC(17:1(9Z)/15:0)	LMGP01011525
	PC(18:0/14:1(9Z))	LMGP01011582
	PC(19:1(9Z)/13:0)	LMGP01011757
	PC(20:1(11Z)/12:0)	LMGP01011805
	PC(18:1(11Z)/14:0)	LMGP01012145
	PC(O-16:0/17:1(9Z))	LMGP01020183
	PC(O-18:0/15:1(9Z))	LMGP01020198
	PC(P-16:0/17:0)	LMGP01030027
	PC(P-18:0/15:0)	LMGP01030050
	PC(P-20:0/13:0)	LMGP01030075
PC aa C32:2	PC(14:0/18:2(11Z,14Z))	LMGP01010494
	PC(14:0/18:2(9Z,12Z))	LMGP01010496
	PC(16:1(9E)/16:1(9E))	LMGP01010682
	PC(16:1(9Z)/16:1(9Z))	LMGP01010684
	PC(12:0/20:2(11Z,14Z))	LMGP01011330
	PC(14:1(9Z)/18:1(9Z))	LMGP01011390
	PC(15:0/17:2(9Z,12Z))	LMGP01011414
	PC(15:1(9Z)/17:1(9Z))	LMGP01011440
	PC(17:1(9Z)/15:1(9Z))	LMGP01011526
	PC(17:2(9Z,12Z)/15:0)	LMGP01011555
	PC(18:1(9Z)/14:1(9Z))	LMGP01011597
	PC(18:2(9Z,12Z)/14:0)	LMGP01011616
	PC(20:2(11Z,14Z)/12:0)	LMGP01011835
	PC(O-16:0/17:2(9Z,12Z))	LMGP01020184
	PC(P-16:0/17:1(9Z))	LMGP01030028
	PC(P-18:0/15:1(9Z))	LMGP01030051
PC aa C32:3	PC(14:0/18:3(9Z,12Z,15Z))	LMGP01010497
	PC(12:0/20:3(8Z,11Z,14Z))	LMGP01011331
	PC(14:0/18:3(6Z,9Z,12Z))	LMGP01011369
	PC(14:1(9Z)/18:2(9Z,12Z))	LMGP01011391
	PC(15:1(9Z)/17:2(9Z,12Z))	LMGP01011441
	PC(17:2(9Z,12Z)/15:1(9Z))	LMGP01011556
	PC(18:2(9Z,12Z)/14:1(9Z))	LMGP01011617
	PC(18:3(6Z,9Z,12Z)/14:0)	LMGP01011642
	PC(18:3(9Z,12Z,15Z)/14:0)	LMGP01011673
	PC(20:3(8Z,11Z,14Z)/12:0)	LMGP01011866
	PC(P-16:0/17:2(9Z,12Z))	LMGP01030029
PC aa C34:2	PC(16:0/18:2(10E,12Z))	LMGP01010585
	PC(16:0/18:2(11Z,13Z))	LMGP01010586
	PC(16:0/18:2(2E,4E))	LMGP01010587
	PC(16:0/18:2(2Z,4Z))	LMGP01010588
	PC(16:0/18:2(6Z,9Z))	LMGP01010589
	PC(16:0/18:2(9E,11E))	LMGP01010590
	PC(16:0/18:2(9E,11Z))	LMGP01010591
	PC(16:0/18:2(9E,12E))	LMGP01010592
	PC(16:0/18:2(9Z,12Z))	LMGP01010594
	PC(16:1(2Z)/18:1(9Z))	LMGP01010678
	PC(16:1(9Z)/18:1(11Z))	LMGP01010687
	PC(16:1(9Z)/18:1(9Z))	LMGP01010688
	PC(17:1(10Z)/17:1(10Z))	LMGP01010727
	PC(17:1(9Z)/17:1(9Z))	LMGP01010728
	PC(18:0/16:2(2E,4E))	LMGP01010745
	PC(18:1(9Z)/16:1(9Z))	LMGP01010887
	PC(18:2(2E,4E)/16:0)	LMGP01010920
	PC(18:2(6Z,9Z)/16:0)	LMGP01010926
	PC(18:2(9Z,12Z)/16:0)	LMGP01010932
	PC(12:0/22:2(13Z,16Z))	LMGP01011336
	PC(14:0/20:2(11Z,14Z))	LMGP01011373
	PC(14:1(9Z)/20:1(11Z))	LMGP01011398
	PC(15:1(9Z)/19:1(9Z))	LMGP01011449
	PC(17:0/17:2(9Z,12Z))	LMGP01011504
	PC(17:2(9Z,12Z)/17:0)	LMGP01011559
	PC(19:1(9Z)/15:1(9Z))	LMGP01011761
	PC(20:1(11Z)/14:1(9Z))	LMGP01011808
	PC(20:2(11Z,14Z)/14:0)	LMGP01011837
	PC(22:2(13Z,16Z)/12:0)	LMGP01012035
	PC(18:1(11Z)/16:1(9Z))	LMGP01012147
PC aa C34:4	PC(14:0/20:4(5Z,8Z,11Z,14Z))	LMGP01010506
	PC(16:0/18:4(6Z,9Z,12Z,15Z))	LMGP01010603
	PC(16:0/18:4(9E,11E,13E,15E))	LMGP01010604
	PC(16:0/18:4(9Z,11E,13E,15Z))	LMGP01010606
	PC(16:0/18:4(9Z,11Z,13Z,15Z))	LMGP01010608
	PC(16:2(2E,4E)/18:2(2E,4E))	LMGP01010699
	PC(17:2(9Z,12Z)/17:2(9Z,12Z))	LMGP01010731
	PC(18:4(9Z,11E,13E,15Z)/16:0)	LMGP01010963
	PC(12:0/22:4(7Z,10Z,13Z,16Z))	LMGP01011337
	PC(14:1(9Z)/20:3(8Z,11Z,14Z))	LMGP01011400
	PC(16:1(9Z)/18:3(6Z,9Z,12Z))	LMGP01011484
	PC(16:1(9Z)/18:3(9Z,12Z,15Z))	LMGP01011485
	PC(18:3(6Z,9Z,12Z)/16:1(9Z))	LMGP01011647
	PC(18:3(9Z,12Z,15Z)/16:1(9Z))	LMGP01011678
	PC(18:4(6Z,9Z,12Z,15Z)/16:0)	LMGP01011706
	PC(20:3(8Z,11Z,14Z)/14:1(9Z))	LMGP01011869
	PC(20:4(5Z,8Z,11Z,14Z)/14:0)	LMGP01011899
	PC(22:4(7Z,10Z,13Z,16Z)/12:0)	LMGP01012066
	PC(14:0/20:4(8Z,11Z,14Z,17Z))	LMGP01012128
	PC(14:1(9Z)/20:3(5Z,8Z,11Z))	LMGP01012132
	PC(20:3(5Z,8Z,11Z)/14:1(9Z))	LMGP01012193
	PC(20:4(8Z,11Z,14Z,17Z)/14:0)	LMGP01012209
	PC(O-15:0/20:4(5Z,8Z,11Z,14Z))	LMGP01020026
PC aa C36:2	PC(18:0/18:2(10Z,12Z))	LMGP01010764
	PC(18:0/18:2(2E,4E))	LMGP01010765
	PC(18:0/18:2(6Z,9Z))	LMGP01010766
	PC(18:0/18:2(9Z,12Z))	LMGP01010768
	PC(18:1(10Z)/18:1(10Z))	LMGP01010836
	PC(18:1(11E)/18:1(11E))	LMGP01010837
	PC(18:1(11Z)/18:1(11Z))	LMGP01010841
	PC(18:1(12Z)/18:1(12Z))	LMGP01010849
	PC(18:1(13Z)/18:1(13Z))	LMGP01010851
	PC(18:1(14Z)/18:1(14Z))	LMGP01010853
	PC(18:1(15Z)/18:1(15Z))	LMGP01010855
	PC(18:1(16Z)/18:1(16Z))	LMGP01010857
	PC(18:1(17Z)/18:1(17Z))	LMGP01010858
	PC(18:1(2Z)/18:1(2Z))	LMGP01010860
	PC(18:1(3Z)/18:1(3Z))	LMGP01010862
	PC(18:1(5Z)/18:1(5Z))	LMGP01010865
	PC(18:1(6E)/18:1(6E))	LMGP01010866
	PC(18:1(6Z)/18:1(6Z))	LMGP01010868
	PC(18:1(7Z)/18:1(7Z))	LMGP01010871
	PC(18:1(8Z)/18:1(8Z))	LMGP01010873
	PC(18:1(9E)/18:1(9E))	LMGP01010876
	PC(18:1(9Z)/18:1(9Z))	LMGP01010890
	PC(18:2(9Z,12Z)/18:0)	LMGP01010935
	PC(18:1(4Z)/18:1(4Z))	LMGP01010966
	PC(14:0/22:2(13Z,16Z))	LMGP01011377
	PC(14:1(9Z)/22:1(11Z))	LMGP01011405
	PC(16:0/20:2(11Z,14Z))	LMGP01011469
	PC(16:1(9Z)/20:1(11Z))	LMGP01011489
	PC(17:1(9Z)/19:1(9Z))	LMGP01011538
	PC(17:2(9Z,12Z)/19:0)	LMGP01011567
	PC(19:0/17:2(9Z,12Z))	LMGP01011737
	PC(19:1(9Z)/17:1(9Z))	LMGP01011765
	PC(20:1(11Z)/16:1(9Z))	LMGP01011812
	PC(20:2(11Z,14Z)/16:0)	LMGP01011841
	PC(22:1(11Z)/14:1(9Z))	LMGP01012007
	PC(22:2(13Z,16Z)/14:0)	LMGP01012037
	PC(14:1(9Z)/22:1(13Z))	LMGP01012133
	PC(18:1(11Z)/18:1(9Z))	LMGP01012148
	PC(18:1(9Z)/18:1(11Z))	LMGP01012163
	PC(22:1(13Z)/14:1(9Z))	LMGP01012219
PC aa C36:3	PC(16:0/20:3(5Z,8Z,11Z))	LMGP01010622
	PC(16:0/20:3(8E,11E,14E))	LMGP01010624
	PC(16:0/20:3(8Z,11Z,14Z))	LMGP01010627
	PC(18:1(9Z)/18:2(6Z,9Z))	LMGP01010893
	PC(18:1(9Z)/18:2(9Z,12Z))	LMGP01010895
	PC(14:1(9Z)/22:2(13Z,16Z))	LMGP01011406
	PC(16:1(9Z)/20:2(11Z,14Z))	LMGP01011490
	PC(17:2(9Z,12Z)/19:1(9Z))	LMGP01011568
	PC(18:0/18:3(6Z,9Z,12Z))	LMGP01011588
	PC(18:0/18:3(9Z,12Z,15Z))	LMGP01011589
	PC(18:2(9Z,12Z)/18:1(9Z))	LMGP01011624
	PC(18:3(6Z,9Z,12Z)/18:0)	LMGP01011651
	PC(18:3(9Z,12Z,15Z)/18:0)	LMGP01011682
	PC(19:1(9Z)/17:2(9Z,12Z))	LMGP01011766
	PC(20:2(11Z,14Z)/16:1(9Z))	LMGP01011842
	PC(20:3(8Z,11Z,14Z)/16:0)	LMGP01011872
	PC(22:2(13Z,16Z)/14:1(9Z))	LMGP01012038
	PC(18:1(11Z)/18:2(9Z,12Z))	LMGP01012149
	PC(18:2(9Z,12Z)/18:1(11Z))	LMGP01012168
	PC(20:3(5Z,8Z,11Z)/16:0)	LMGP01012194
PC aa C36:6	PC(14:0/22:6(4Z,7Z,10Z,13Z,16Z,19Z))	LMGP01010512
	PC(18:3(9E,11E,13E)/18:3(9E,11E,13E))	LMGP01010952
	PC(18:3(9Z,11E,13E)/18:3(9Z,11E,13E))	LMGP01010954
	PC(18:3(9Z,12Z,15Z)/18:3(9Z,12Z,15Z))	LMGP01010956
	PC(18:4(9E,11E,13E,15E)/18:2(9Z,12Z))	LMGP01010960
	PC(16:1(9Z)/20:5(5Z,8Z,11Z,14Z,17Z))	LMGP01011492
	PC(18:2(9Z,12Z)/18:4(6Z,9Z,12Z,15Z))	LMGP01011627
	PC(18:3(6Z,9Z,12Z)/18:3(6Z,9Z,12Z))	LMGP01011654
	PC(18:3(6Z,9Z,12Z)/18:3(9Z,12Z,15Z))	LMGP01011655
	PC(18:3(9Z,12Z,15Z)/18:3(6Z,9Z,12Z))	LMGP01011684
	PC(18:4(6Z,9Z,12Z,15Z)/18:2(9Z,12Z))	LMGP01011713
	PC(20:5(5Z,8Z,11Z,14Z,17Z)/16:1(9Z))	LMGP01011933
	PC(22:6(4Z,7Z,10Z,13Z,16Z,19Z)/14:0)	LMGP01012099
	PC(14:1(9Z)/22:5(4Z,7Z,10Z,13Z,16Z))	LMGP01012134
	PC(14:1(9Z)/22:5(7Z,10Z,13Z,16Z,19Z))	LMGP01012135
	PC(22:5(4Z,7Z,10Z,13Z,16Z)/14:1(9Z))	LMGP01012233
	PC(22:5(7Z,10Z,13Z,16Z,19Z)/14:1(9Z))	LMGP01012235
	Phosphatidylcholine O-37:6	-
PC aa C38:3	PC(18:0/20:3(5Z,11Z,14Z))	LMGP01010795
	PC(18:0/20:3(5Z,8Z,11Z))	LMGP01010796
	PC(18:0/20:3(5Z,8Z,14Z))	LMGP01010798
	PC(18:0/20:3(8Z,11Z,14Z))	LMGP01010799
	PC(18:2(9Z,12Z)/20:1(13Z))	LMGP01010942
	PC(16:1(9Z)/22:2(13Z,16Z))	LMGP01011496
	PC(18:1(9Z)/20:2(11Z,14Z))	LMGP01011608
	PC(18:2(9Z,12Z)/20:1(11Z))	LMGP01011631
	PC(18:3(6Z,9Z,12Z)/20:0)	LMGP01011659
	PC(18:3(9Z,12Z,15Z)/20:0)	LMGP01011688
	PC(20:0/18:3(6Z,9Z,12Z))	LMGP01011794
	PC(20:0/18:3(9Z,12Z,15Z))	LMGP01011795
	PC(20:1(11Z)/18:2(9Z,12Z))	LMGP01011818
	PC(20:2(11Z,14Z)/18:1(9Z))	LMGP01011847
	PC(20:3(8Z,11Z,14Z)/18:0)	LMGP01011877
	PC(22:2(13Z,16Z)/16:1(9Z))	LMGP01012042
	PC(18:1(11Z)/20:2(11Z,14Z))	LMGP01012153
	PC(20:2(11Z,14Z)/18:1(11Z))	LMGP01012190
	PC(20:3(5Z,8Z,11Z)/18:0)	LMGP01012196
PC aa C40:4	PC(18:0/22:4(7Z,10Z,13Z,16Z))	LMGP01010813
	PC(20:0/20:4(5Z,8Z,11Z,14Z))	LMGP01011023
	PC(20:2(11E,14E)/20:2(11E,14E))	LMGP01011045
	PC(18:2(9Z,12Z)/22:2(13Z,16Z))	LMGP01011638
	PC(18:3(6Z,9Z,12Z)/22:1(11Z))	LMGP01011667
	PC(18:3(9Z,12Z,15Z)/22:1(11Z))	LMGP01011696
	PC(18:4(6Z,9Z,12Z,15Z)/22:0)	LMGP01011726
	PC(20:1(11Z)/20:3(8Z,11Z,14Z))	LMGP01011826
	PC(20:2(11Z,14Z)/20:2(11Z,14Z))	LMGP01011856
	PC(20:3(8Z,11Z,14Z)/20:1(11Z))	LMGP01011886
	PC(20:4(5Z,8Z,11Z,14Z)/20:0)	LMGP01011915
	PC(22:0/18:4(6Z,9Z,12Z,15Z))	LMGP01011991
	PC(22:1(11Z)/18:3(6Z,9Z,12Z))	LMGP01012018
	PC(22:1(11Z)/18:3(9Z,12Z,15Z))	LMGP01012019
	PC(22:2(13Z,16Z)/18:2(9Z,12Z))	LMGP01012048
	PC(22:4(7Z,10Z,13Z,16Z)/18:0)	LMGP01012077
	PC(18:3(6Z,9Z,12Z)/22:1(13Z))	LMGP01012176
	PC(18:3(9Z,12Z,15Z)/22:1(13Z))	LMGP01012180
	PC(20:0/20:4(8Z,11Z,14Z,17Z))	LMGP01012186
	PC(20:1(11Z)/20:3(5Z,8Z,11Z))	LMGP01012187
	PC(20:3(5Z,8Z,11Z)/20:1(11Z))	LMGP01012203
	PC(20:4(8Z,11Z,14Z,17Z)/20:0)	LMGP01012213
	PC(22:1(13Z)/18:3(6Z,9Z,12Z))	LMGP01012223
	PC(22:1(13Z)/18:3(9Z,12Z,15Z))	LMGP01012224
PC aa C40:5	PC(18:0/22:5(4Z,7Z,10Z,13Z,16Z))	LMGP01010816
	PC(18:0/22:5(7Z,10Z,13Z,16Z,19Z))	LMGP01010818
	PC(18:1(9Z)/22:4(7Z,10Z,13Z,16Z))	LMGP01011613
	PC(18:3(6Z,9Z,12Z)/22:2(13Z,16Z))	LMGP01011668
	PC(18:3(9Z,12Z,15Z)/22:2(13Z,16Z))	LMGP01011697
	PC(18:4(6Z,9Z,12Z,15Z)/22:1(11Z))	LMGP01011727
	PC(20:0/20:5(5Z,8Z,11Z,14Z,17Z))	LMGP01011800
	PC(20:1(11Z)/20:4(5Z,8Z,11Z,14Z))	LMGP01011827
	PC(20:2(11Z,14Z)/20:3(8Z,11Z,14Z))	LMGP01011857
	PC(20:3(8Z,11Z,14Z)/20:2(11Z,14Z))	LMGP01011887
	PC(20:4(5Z,8Z,11Z,14Z)/20:1(11Z))	LMGP01011916
	PC(20:5(5Z,8Z,11Z,14Z,17Z)/20:0)	LMGP01011944
	PC(22:1(11Z)/18:4(6Z,9Z,12Z,15Z))	LMGP01012020
	PC(22:2(13Z,16Z)/18:3(6Z,9Z,12Z))	LMGP01012049
	PC(22:2(13Z,16Z)/18:3(9Z,12Z,15Z))	LMGP01012050
	PC(22:4(7Z,10Z,13Z,16Z)/18:1(9Z))	LMGP01012078
	PC(18:1(11Z)/22:4(7Z,10Z,13Z,16Z))	LMGP01012160
	PC(18:4(6Z,9Z,12Z,15Z)/22:1(13Z))	LMGP01012183
	PC(20:1(11Z)/20:4(8Z,11Z,14Z,17Z))	LMGP01012188
	PC(20:2(11Z,14Z)/20:3(5Z,8Z,11Z))	LMGP01012191
	PC(20:3(5Z,8Z,11Z)/20:2(11Z,14Z))	LMGP01012204
	PC(20:4(8Z,11Z,14Z,17Z)/20:1(11Z))	LMGP01012214
	PC(22:1(13Z)/18:4(6Z,9Z,12Z,15Z))	LMGP01012225
	PC(22:4(7Z,10Z,13Z,16Z)/18:1(11Z))	LMGP01012231
PC aa C42:1	PC(18:0/24:1(15Z))	LMGP01010826
	PC(18:1(9Z)/24:0)	LMGP01010915
	PC(20:0/22:1(13Z))	LMGP01011026
	PC(20:1(13E)/22:0)	LMGP01011040
	PC(20:1(13Z)/22:0)	LMGP01011041
	PC(22:0/20:1(11Z))	LMGP01011097
	PC(24:0/18:1(6Z))	LMGP01011151
	PC(24:0/18:1(9Z))	LMGP01011152
	PC(20:0/22:1(11Z))	LMGP01011802
	PC(20:1(11Z)/22:0)	LMGP01011830
	PC(22:1(11Z)/20:0)	LMGP01012023
	PC(18:1(11Z)/24:0)	LMGP01012161
	PC(22:1(13Z)/20:0)	LMGP01012226
	PC(24:0/18:1(11Z))	LMGP01012236
	PC(24:1(15Z)/18:0)	LMGP01012240
PC aa C42:6	PC(20:0/22:6(4Z,7Z,10Z,13Z,16Z,19Z))	LMGP01011028
	PC(20:2(11Z,14Z)/22:4(7Z,10Z,13Z,16Z))	LMGP01011864
	PC(20:4(5Z,8Z,11Z,14Z)/22:2(13Z,16Z))	LMGP01011923
	PC(20:5(5Z,8Z,11Z,14Z,17Z)/22:1(11Z))	LMGP01011952
	PC(22:1(11Z)/20:5(5Z,8Z,11Z,14Z,17Z))	LMGP01012028
	PC(22:2(13Z,16Z)/20:4(5Z,8Z,11Z,14Z))	LMGP01012058
	PC(22:4(7Z,10Z,13Z,16Z)/20:2(11Z,14Z))	LMGP01012087
	PC(22:6(4Z,7Z,10Z,13Z,16Z,19Z)/20:0)	LMGP01012115
PC ae C34:3	PC(13:0/20:3(8Z,11Z,14Z))	LMGP01011355
	PC(15:0/18:3(6Z,9Z,12Z))	LMGP01011416
	PC(15:0/18:3(9Z,12Z,15Z))	LMGP01011417
	PC(15:1(9Z)/18:2(9Z,12Z))	LMGP01011444
	PC(16:1(9Z)/17:2(9Z,12Z))	LMGP01011482
	PC(17:2(9Z,12Z)/16:1(9Z))	LMGP01011558
	PC(18:2(9Z,12Z)/15:1(9Z))	LMGP01011619
	PC(18:3(6Z,9Z,12Z)/15:0)	LMGP01011644
	PC(18:3(9Z,12Z,15Z)/15:0)	LMGP01011675
	PC(20:3(8Z,11Z,14Z)/13:0)	LMGP01011867
	PC(O-16:0/18:3(6Z,9Z,12Z))	LMGP01020041
	PC(O-16:0/18:3(9Z,12Z,15Z))	LMGP01020042
	PC(O-16:1(9Z)/18:2(9Z,12Z))	LMGP01020257
	PC(P-16:0/18:2(9Z,12Z))	LMGP01030008
	PC(P-18:1(11Z)/16:1(9Z))	LMGP01030135
	PC(P-18:1(9Z)/16:1(9Z))	LMGP01030145
PC ae C36:2	PC(13:0/22:2(13Z,16Z))	LMGP01011360
	PC(15:0/20:2(11Z,14Z))	LMGP01011422
	PC(15:1(9Z)/20:1(11Z))	LMGP01011451
	PC(16:1(9Z)/19:1(9Z))	LMGP01011487
	PC(17:0/18:2(9Z,12Z))	LMGP01011505
	PC(17:1(9Z)/18:1(9Z))	LMGP01011532
	PC(17:2(9Z,12Z)/18:0)	LMGP01011561
	PC(18:0/17:2(9Z,12Z))	LMGP01011587
	PC(18:1(9Z)/17:1(9Z))	LMGP01011601
	PC(18:2(9Z,12Z)/17:0)	LMGP01011621
	PC(19:1(9Z)/16:1(9Z))	LMGP01011763
	PC(20:1(11Z)/15:1(9Z))	LMGP01011810
	PC(20:2(11Z,14Z)/15:0)	LMGP01011839
	PC(22:2(13Z,16Z)/13:0)	LMGP01012036
	PC(O-16:0/20:2(11Z,14Z))	LMGP01020188
	PC(O-18:0/18:2(9Z,12Z))	LMGP01020203
	PC(O-18:1(9Z)/18:1(11Z))	LMGP01020263
	PC(P-18:0/18:1(9Z))	LMGP01030013
	PC(P-16:0/20:1(11Z))	LMGP01030037
	PC(P-20:0/16:1(9Z))	LMGP01030081
	PC(P-18:0/18:1(11Z))	LMGP01030130
	PC(P-18:1(11Z)/18:0)	LMGP01030136
	PC(P-18:1(9Z)/18:0)	LMGP01030146
PC ae C36:3	PC(15:0/20:3(8Z,11Z,14Z))	LMGP01011423
	PC(15:1(9Z)/20:2(11Z,14Z))	LMGP01011452
	PC(17:0/18:3(6Z,9Z,12Z))	LMGP01011506
	PC(17:0/18:3(9Z,12Z,15Z))	LMGP01011507
	PC(17:1(9Z)/18:2(9Z,12Z))	LMGP01011533
	PC(17:2(9Z,12Z)/18:1(9Z))	LMGP01011562
	PC(18:1(9Z)/17:2(9Z,12Z))	LMGP01011602
	PC(18:2(9Z,12Z)/17:1(9Z))	LMGP01011622
	PC(18:3(6Z,9Z,12Z)/17:0)	LMGP01011648
	PC(18:3(9Z,12Z,15Z)/17:0)	LMGP01011679
	PC(20:2(11Z,14Z)/15:1(9Z))	LMGP01011840
	PC(20:3(8Z,11Z,14Z)/15:0)	LMGP01011870
	PC(O-16:0/20:3(8Z,11Z,14Z))	LMGP01020053
	PC(O-18:0/18:3(6Z,9Z,12Z))	LMGP01020204
	PC(O-18:0/18:3(9Z,12Z,15Z))	LMGP01020205
	PC(O-18:1(11Z)/18:2(9Z,12Z))	LMGP01020262
	PC(O-18:1(9Z)/18:2(9Z,12Z))	LMGP01020264
	PC(P-16:0/20:2(11Z,14Z))	LMGP01030038
	PC(P-18:0/18:2(9Z,12Z))	LMGP01030058
	PC(P-18:1(11Z)/18:1(11Z))	LMGP01030137
PC ae C36:4	PC(18:2(9Z,12E)/17:2(9Z,11E))	LMGP01010931
	PC(13:0/22:4(7Z,10Z,13Z,16Z))	LMGP01011361
	PC(15:0/20:4(5Z,8Z,11Z,14Z))	LMGP01011424
	PC(15:1(9Z)/20:3(8Z,11Z,14Z))	LMGP01011453
	PC(17:0/18:4(6Z,9Z,12Z,15Z))	LMGP01011508
	PC(17:1(9Z)/18:3(6Z,9Z,12Z))	LMGP01011534
	PC(17:1(9Z)/18:3(9Z,12Z,15Z))	LMGP01011535
	PC(17:2(9Z,12Z)/18:2(9Z,12Z))	LMGP01011563
	PC(18:2(9Z,12Z)/17:2(9Z,12Z))	LMGP01011623
	PC(18:3(6Z,9Z,12Z)/17:1(9Z))	LMGP01011649
	PC(18:3(9Z,12Z,15Z)/17:1(9Z))	LMGP01011680
	PC(18:4(6Z,9Z,12Z,15Z)/17:0)	LMGP01011708
	PC(20:3(8Z,11Z,14Z)/15:1(9Z))	LMGP01011871
	PC(20:4(5Z,8Z,11Z,14Z)/15:0)	LMGP01011901
	PC(22:4(7Z,10Z,13Z,16Z)/13:0)	LMGP01012067
	PC(O-16:0/20:4(5E,8E,11E,14E))	LMGP01020054
	PC(O-16:0/20:4(5Z,8Z,11Z,14Z))	LMGP01020056
	PC(O-18:0/18:4(6Z,9Z,12Z,15Z))	LMGP01020206
	PC(O-16:0/20:4(8Z,11Z,14Z,17Z))	LMGP01020245
	PC(O-18:2(9Z,12Z)/18:2(9Z,12Z))	LMGP01020270
	PC(P-16:0/20:3(8Z,11Z,14Z))	LMGP01030039
	PC(P-18:0/18:3(6Z,9Z,12Z))	LMGP01030059
	PC(P-18:0/18:3(9Z,12Z,15Z))	LMGP01030060
	PC(P-16:0/20:3(5Z,8Z,11Z))	LMGP01030129
PC ae C38:2	PC(15:0/22:2(13Z,16Z))	LMGP01011428
	PC(15:1(9Z)/22:1(11Z))	LMGP01011458
	PC(17:0/20:2(11Z,14Z))	LMGP01011513
	PC(17:1(9Z)/20:1(11Z))	LMGP01011540
	PC(17:2(9Z,12Z)/20:0)	LMGP01011569
	PC(18:1(9Z)/19:1(9Z))	LMGP01011606
	PC(18:2(9Z,12Z)/19:0)	LMGP01011628
	PC(19:0/18:2(9Z,12Z))	LMGP01011739
	PC(19:1(9Z)/18:1(9Z))	LMGP01011768
	PC(20:0/17:2(9Z,12Z))	LMGP01011793
	PC(20:1(11Z)/17:1(9Z))	LMGP01011814
	PC(20:2(11Z,14Z)/17:0)	LMGP01011843
	PC(22:1(11Z)/15:1(9Z))	LMGP01012009
	PC(22:2(13Z,16Z)/15:0)	LMGP01012039
	PC(O-16:0/22:2(13Z,16Z))	LMGP01020191
	PC(O-18:0/20:2(11Z,14Z))	LMGP01020210
	PC(O-20:0/18:2(9Z,12Z))	LMGP01020228
	PC(O-18:1(9Z)/20:1(11Z))	LMGP01020266
	PC(O-18:2(9Z,12Z)/20:0)	LMGP01020271
	PC(P-16:0/22:1(11Z))	LMGP01030043
	PC(P-18:0/20:1(11Z))	LMGP01030065
	PC(P-20:0/18:1(9Z))	LMGP01030086
PC ae C38:3	PC(15:1(9Z)/22:2(13Z,16Z))	LMGP01011459
	PC(17:0/20:3(8Z,11Z,14Z))	LMGP01011514
	PC(17:1(9Z)/20:2(11Z,14Z))	LMGP01011541
	PC(17:2(9Z,12Z)/20:1(11Z))	LMGP01011570
	PC(18:2(9Z,12Z)/19:1(9Z))	LMGP01011629
	PC(18:3(6Z,9Z,12Z)/19:0)	LMGP01011657
	PC(18:3(9Z,12Z,15Z)/19:0)	LMGP01011686
	PC(19:0/18:3(6Z,9Z,12Z))	LMGP01011740
	PC(19:0/18:3(9Z,12Z,15Z))	LMGP01011741
	PC(19:1(9Z)/18:2(9Z,12Z))	LMGP01011769
	PC(20:1(11Z)/17:2(9Z,12Z))	LMGP01011815
	PC(20:2(11Z,14Z)/17:1(9Z))	LMGP01011844
	PC(20:3(8Z,11Z,14Z)/17:0)	LMGP01011874
	PC(22:2(13Z,16Z)/15:1(9Z))	LMGP01012040
	PC(O-18:0/20:3(8Z,11Z,14Z))	LMGP01020211
	PC(O-20:0/18:3(6Z,9Z,12Z))	LMGP01020229
	PC(O-20:0/18:3(9Z,12Z,15Z))	LMGP01020230
	PC(P-16:0/22:2(13Z,16Z))	LMGP01030044
	PC(P-18:0/20:2(11Z,14Z))	LMGP01030066
	PC(P-20:0/18:2(9Z,12Z))	LMGP01030087
PC ae C38:4	PC(17:0/20:4(5Z,8Z,11Z,14Z))	LMGP01010003
	PC(15:0/22:4(7Z,10Z,13Z,16Z))	LMGP01011429
	PC(17:1(9Z)/20:3(8Z,11Z,14Z))	LMGP01011542
	PC(17:2(9Z,12Z)/20:2(11Z,14Z))	LMGP01011571
	PC(18:3(6Z,9Z,12Z)/19:1(9Z))	LMGP01011658
	PC(18:3(9Z,12Z,15Z)/19:1(9Z))	LMGP01011687
	PC(18:4(6Z,9Z,12Z,15Z)/19:0)	LMGP01011717
	PC(19:0/18:4(6Z,9Z,12Z,15Z))	LMGP01011742
	PC(19:1(9Z)/18:3(6Z,9Z,12Z))	LMGP01011770
	PC(19:1(9Z)/18:3(9Z,12Z,15Z))	LMGP01011771
	PC(20:2(11Z,14Z)/17:2(9Z,12Z))	LMGP01011845
	PC(20:3(8Z,11Z,14Z)/17:1(9Z))	LMGP01011875
	PC(20:4(5Z,8Z,11Z,14Z)/17:0)	LMGP01011904
	PC(22:4(7Z,10Z,13Z,16Z)/15:0)	LMGP01012070
	PC(O-18:0/20:4(5E,8E,11E,14E))	LMGP01020100
	PC(O-18:0/20:4(5Z,8Z,11Z,14Z))	LMGP01020102
	PC(O-16:0/22:4(7Z,10Z,13Z,16Z))	LMGP01020192
	PC(O-20:0/18:4(6Z,9Z,12Z,15Z))	LMGP01020231
	PC(O-18:0/20:4(8Z,11Z,14Z,17Z))	LMGP01020247
	PC(P-18:0/20:3(8Z,11Z,14Z))	LMGP01030067
	PC(P-20:0/18:3(6Z,9Z,12Z))	LMGP01030088
	PC(P-20:0/18:3(9Z,12Z,15Z))	LMGP01030089
	PC(P-18:0/20:3(5Z,8Z,11Z))	LMGP01030131
	PC(P-18:1(11Z)/20:2(11Z,14Z))	LMGP01030138
PC ae C38:5	PC(15:1(9Z)/22:4(7Z,10Z,13Z,16Z))	LMGP01011460
	PC(17:0/20:5(5Z,8Z,11Z,14Z,17Z))	LMGP01011515
	PC(17:1(9Z)/20:4(5Z,8Z,11Z,14Z))	LMGP01011543
	PC(17:2(9Z,12Z)/20:3(8Z,11Z,14Z))	LMGP01011572
	PC(18:4(6Z,9Z,12Z,15Z)/19:1(9Z))	LMGP01011718
	PC(19:1(9Z)/18:4(6Z,9Z,12Z,15Z))	LMGP01011772
	PC(20:3(8Z,11Z,14Z)/17:2(9Z,12Z))	LMGP01011876
	PC(20:4(5Z,8Z,11Z,14Z)/17:1(9Z))	LMGP01011905
	PC(20:5(5Z,8Z,11Z,14Z,17Z)/17:0)	LMGP01011934
	PC(22:4(7Z,10Z,13Z,16Z)/15:1(9Z))	LMGP01012071
	PC(O-16:0/22:5(7Z,10Z,13Z,16Z,19Z))	LMGP01020066
	PC(O-18:0/20:5(5Z,8Z,11Z,14Z,17Z))	LMGP01020104
	PC(O-18:1(9Z)/20:4(5Z,8Z,11Z,14Z))	LMGP01020157
	PC(O-18:1(9Z)/20:4(8Z,11Z,14Z,17Z))	LMGP01020267
	PC(P-18:0/20:4(5Z,8Z,11Z,14Z))	LMGP01030012
	PC(P-16:0/22:4(7Z,10Z,13Z,16Z))	LMGP01030045
	PC(P-20:0/18:4(6Z,9Z,12Z,15Z))	LMGP01030090
PC ae C40:3	PC(17:1(9Z)/22:2(13Z,16Z))	LMGP01011548
	PC(17:2(9Z,12Z)/22:1(11Z))	LMGP01011577
	PC(18:3(6Z,9Z,12Z)/21:0)	LMGP01011665
	PC(18:3(9Z,12Z,15Z)/21:0)	LMGP01011694
	PC(19:0/20:3(8Z,11Z,14Z))	LMGP01011747
	PC(19:1(9Z)/20:2(11Z,14Z))	LMGP01011777
	PC(20:2(11Z,14Z)/19:1(9Z))	LMGP01011853
	PC(20:3(8Z,11Z,14Z)/19:0)	LMGP01011883
	PC(21:0/18:3(6Z,9Z,12Z))	LMGP01011965
	PC(21:0/18:3(9Z,12Z,15Z))	LMGP01011966
	PC(22:1(11Z)/17:2(9Z,12Z))	LMGP01012014
	PC(22:2(13Z,16Z)/17:1(9Z))	LMGP01012044
	PC(O-20:0/20:3(8Z,11Z,14Z))	LMGP01020237
	PC(O-22:0/18:3(9Z,12Z,15Z))	LMGP01020249
	PC(P-18:0/22:2(13Z,16Z))	LMGP01030072
	PC(P-20:0/20:2(11Z,14Z))	LMGP01030095
	PC(P-18:1(11Z)/22:1(13Z))	LMGP01030139
	PC(P-18:1(9Z)/22:1(13Z))	LMGP01030147
PC ae C42:2	PC(19:0/22:2(13Z,16Z))	LMGP01011753
	PC(19:1(9Z)/22:1(11Z))	LMGP01011783
	PC(20:2(11Z,14Z)/21:0)	LMGP01011860
	PC(21:0/20:2(11Z,14Z))	LMGP01011972
	PC(22:1(11Z)/19:1(9Z))	LMGP01012022
	PC(22:2(13Z,16Z)/19:0)	LMGP01012052
	PC(O-20:0/22:2(13Z,16Z))	LMGP01020242
	PC(O-18:2(9Z,12Z)/24:0)	LMGP01020273
	PC(P-20:0/22:1(11Z))	LMGP01030101
	PC(P-18:0/24:1(15Z))	LMGP01030132
	PC(P-18:1(11Z)/24:0)	LMGP01030141
	PC(P-18:1(9Z)/24:0)	LMGP01030149
Sphingomyelins
SM (OH) C14:1	SM(d16:1/17:0)	LMSP03010037
	SM(d18:1/15:0)	LMSP03010038
SM C16:1	SM(d16:1/18:1)	LMSP03010040
	SM(d18:1/16:1)	LMSP03010041
	SM(d18:2/16:0)	LMSP03010090
SM (OH) C16:1	SM(d18:1/17:0)	LMSP03010044
	SM(d19:1/16:0)	LMSP03010045
SM C18:0	SM(d18:1/18:0)	LMSP03010001
	SM(d18:0/18:1(9Z))	LMSP03010031
	SM(d16:1/20:0)	LMSP03010052
SM (OH) C22:1	SM(d16:1/25:0)	LMSP03010076
	SM(d17:1/24:0)	LMSP03010077
	SM(d18:1/23:0)	LMSP03010078
SM C24:0	SM(d18:1/24:0)	LMSP03010008
	SM(d18:0/24:1(15Z))	LMSP03010023
SM C24:1	SM(d18:1/24:1(15Z))	LMSP03010007
	SM(d18:2/24:0)	LMSP03010081

## Sheet: Table S2
Table S2. Treatment-induced changes in levels of selected amino acids and their derivatives analyzed by LC/MS
Metabolites	Sample A		Sample B		Sample C		Change B-A		Change C-A		Change C-B		Significance of changes
	mean	S.D.	mean	S.D.	mean	S.D.	mean	S.D.	mean	S.D.	mean	S.D.	p-value	q-value (BH corr)
CCRT group
ADMA	0.398654	0.394168	0.424322	0.282045	0.26451	0.257812	0.0256683	0.486883	-0.134144	0.330083	-0.159812	0.400974	0.0848673	0.606888
Alanine	71.6453	67.9744	70.0601	63.7963	38.1626	35.8539	-1.58514	105.194	-33.4827	75.9378	-31.8975	52.9245	0.246597	0.606888
Arginine	101.958	42.5163	102.213	48.7466	83.6663	30.046	0.254445	45.6818	-18.292	53.7797	-18.5464	63.1852	0.0848673	0.606888
Asparagine	8.67029	11.1817	5.96359	5.66254	7.22255	8.95246	-2.7067	14.32	-1.44775	13.8498	1.25895	10.8798	0.691826	0.976145
Aspartic acid	30.2078	56.1455	19.3085	28.0256	11.5224	13.9012	-10.8992	67.1319	-18.6853	58.5764	-7.78612	32.2362	0.691826	0.976145
Betaine	382.485	104.327	407.805	191.469	348.363	122.611	25.3205	177.963	-34.1222	159.377	-59.4427	195.596	0.627089	0.976145
Citruline	27.0894	38.7093	44.4361	45.1274	18.8867	17.8733	17.3468	32.953	-8.20271	47.0363	-25.5495	52.5157	0.42035	0.784654
Creatinine	38.3713	17.0067	45.7874	20.377	43.7443	20.4861	7.41613	26.729	5.37299	21.806	-2.04315	25.6743	0.281769	0.606888
Gamma-aminobutyric acid	20.2501	12.5914	12.4153	7.37163	13.5654	7.80993	-7.83473	12.8214	-6.68463	16.6254	1.1501	10.3856	0.281769	0.606888
Glutamic acid	16.4757	8.72334	12.2207	5.29505	12.45	4.11341	-4.25502	11.4762	-4.02568	9.93876	0.229336	4.59785	0.982609	1
Glutamine	173.482	247.174	151.89	129.393	208.099	237.334	-21.5917	300.933	34.6166	199.036	56.2083	227.118	1	1
Glycine	70.1471	101.17	84.9693	92.4217	89.1376	84.2264	14.8222	161.202	18.9905	123.6	4.16827	104.18	0.765928	0.976145
Histidine	52.5031	34.3331	30.3828	13.0096	22.3403	16.84	-22.1203	38.0243	-30.1628	43.5713	-8.04254	20.7705	0.188876	0.606888
Leucine+Isoleucine	77.6488	33.7794	87.1403	32.4293	62.5261	26.0961	9.49149	40.9531	-15.1226	44.0768	-24.6141	30.6565	0.935507	1
Lysine	89.1185	46.6465	73.4576	33.1363	84.9256	33.1808	-15.6609	47.1527	-4.19286	43.3158	11.468	39.6736	0.935507	1
Methionine	8.32364	13.1197	11.4617	10.3552	12.7738	15.1134	3.13802	16.0589	4.45015	12.5149	1.31213	19.8079	0.707899	0.976145
NMMA	0.186376	0.178344	0.114625	0.136489	0.118374	0.113611	-0.0717513	0.266676	-0.0680019	0.23852	0.00374936	0.161589	0.152383	0.606888
1-methyl-histydyne	1.27959	1.43939	1.293	1.62587	1.41955	1.75111	0.0134113	2.46335	0.139959	2.52999	0.126547	2.60097	0.766971	0.976145
Ornityne	17.2025	15.549	27.1149	20.5718	18.0772	10.8436	9.91244	21.9147	0.874677	15.7153	-9.03776	14.9279	0.100953	0.606888
Phenylalanine	75.4834	34.2756	74.2826	30.0674	53.5216	18.0154	-1.20079	40.312	-21.9617	35.8273	-20.761	34.4846	0.00529295	0.148203
Proline	120.484	38.0147	98.8774	50.8448	85.6167	43.314	-21.6068	55.2862	-34.8675	72.2667	-13.2607	64.8066	0.935507	1
SDMA	0.54525	0.412398	0.393815	0.323413	0.560397	0.451214	-0.151435	0.543328	0.0151474	0.727227	0.166582	0.569571	0.281769	0.606888
Serine	84.4425	56.2079	73.1063	36.1065	51.1477	31.0357	-11.3363	58.1395	-33.2948	67.6996	-21.9585	37.5485	0.174512	0.606888
Taurine	19.3921	30.4673	7.46042	11.686	6.29581	6.65084	-11.9317	35.8115	-13.0963	25.8565	-1.1646	15.3977	0.765928	0.976145
Threonine	55.913	31.1789	93.9981	98.5084	48.1604	30.8645	38.085	101.558	-7.75261	38.9644	-45.8376	100.952	0.246597	0.606888
Trypthophan	21.5525	14.5712	32.3549	19.6192	20.0553	11.6949	10.8024	20.4228	-1.49718	14.4928	-12.2996	18.8662	0.42035	0.784654
Tyrosine	31.8159	17.5621	43.1785	31.6232	34.5659	22.2458	11.3626	34.9651	2.74997	22.8256	-8.61258	37.9669	0.950424	1
Valine	178.167	73.0978	204.322	70.7295	168.94	76.4822	26.1541	80.0805	-9.22743	66.2671	-35.3816	83.5157	0.246597	0.606888
RT group
ADMA	0.473333	0.398734	0.484812	0.379719	0.29997	0.334689	0.0114785	0.595326	-0.173363	0.570294	-0.184841	0.36411	0.477849	0.767935
Alanine	97.6094	69.7146	62.9432	65.5969	44.9751	63.025	-34.6662	95.7304	-52.6343	94.4976	-17.968	101.535	0.66248	0.902702
Arginine	112.104	50.7502	111.619	38.7394	107.887	51.9761	-0.4857	48.0766	-4.21707	72.9361	-3.73137	72.8761	0.942873	0.942873
Asparagine	9.79647	12.1441	9.23688	11.8678	9.05366	14.9021	-0.559591	14.2154	-0.742808	19.9841	-0.183217	19.473	0.194968	0.767935
Aspartic acid	10.6931	12.8117	15.0314	13.048	16.6249	23.1112	4.3383	19.5599	5.93174	28.1815	1.59344	23.2601	0.161455	0.767935
Betaine	422.992	123.507	373.791	79.9544	398.845	130.919	-49.2008	148.751	-24.1474	172.188	25.0535	149.879	0.493673	0.767935
Citruline	27.295	29.0433	31.3671	24.5423	28.969	26.9794	4.07211	36.9251	1.67393	45.5069	-2.39819	39.507	0.327048	0.767935
Creatinine	50.9186	29.0019	35.7674	19.6081	49.0996	19.8057	-15.1513	35.8484	-1.81901	31.0627	13.3322	27.8518	0.465471	0.767935
Gamma-aminobutyric acid	16.4646	9.30314	12.6789	5.18799	12.2075	6.84165	-3.78571	11.4604	-4.25711	12.9112	-0.471399	8.3527	0.367879	0.767935
Glutamic acid	19.9161	11.4279	14.9193	4.7769	15.1678	6.29928	-4.9968	13.3236	-4.74833	12.4793	0.248475	7.81612	0.579578	0.854115
Glutamine	45.338	33.6726	63.7529	63.0091	103.934	93.1649	18.4149	72.6801	58.5956	96.3753	40.1806	91.0117	0.838223	0.902702
Glycine	36.947	34.6577	35.7061	51.4489	57.3519	76.1844	-1.24092	62.4169	20.4049	77.7649	21.6458	74.0697	0.753081	0.902702
Histidine	51.1077	23.9003	35.8403	18.0099	31.9749	17.9237	-15.2673	30.9631	-19.1328	24	-3.86546	27.1847	0.192616	0.767935
Leucine+Isoleucine	102.76	39.2184	82.6671	35.5213	87.4552	45.7853	-20.0927	42.2092	-15.3045	60.4356	4.78816	62.3603	0.481262	0.767935
Lysine	106.655	42.4077	99.4777	49.1232	82.3373	36.219	-7.17743	60.3446	-24.3178	59.0827	-17.1404	51.7615	0.22979	0.767935
Methionine	11.7855	9.26569	6.59454	6.8461	10.7619	10.8066	-5.19095	10.612	-1.02357	15.3796	4.16738	12.2173	0.421626	0.767935
NMMA	0.204522	0.174858	0.164995	0.193963	0.134796	0.114928	-0.0395265	0.303987	-0.0697257	0.228733	-0.0301992	0.24581	0.416061	0.767935
1-methyl-histydyne	2.60853	2.00555	1.92389	1.4808	2.44986	2.52343	-0.684644	2.61477	-0.158672	3.19337	0.525972	3.20748	0.894839	0.927982
Ornityne	40.0484	47.5563	30.2669	23.9417	22.1347	18.5053	-9.78155	48.077	-17.9137	53.2419	-8.13213	28.7705	0.823633	0.902702
Phenylalanine	67.4825	23.8352	54.2701	16.6538	61.3507	36.5424	-13.2123	23.5431	-6.1318	39.0501	7.08054	43.5769	0.22979	0.767935
Proline	123.629	43.2444	104.74	32.4252	94.7352	47.3336	-18.8897	61.5994	-28.8941	62.9733	-10.0044	57.2951	0.0469429	0.767935
SDMA	0.464589	0.43122	0.558327	0.412515	0.420179	0.480956	0.0937378	0.595223	-0.0444102	0.645615	-0.138148	0.557246	0.749852	0.902702
Serine	92.4223	69.4018	75.824	53.3259	69.5945	48.1905	-16.5983	97.3521	-22.8278	66.6691	-6.22948	72.6601	0.390169	0.767935
Taurine	28.257	50.091	18.2018	28.5389	11.6698	14.78	-10.0552	57.587	-16.5872	52.3088	-6.53202	30.3046	0.790338	0.902702
Threonine	59.7784	44.0053	64.0769	32.0139	58.4816	42.1593	4.29856	63.3104	-1.29678	58.2641	-5.59534	42.8587	0.064414	0.767935
Trypthophan	24.2299	10.7468	24.8307	8.93933	19.3324	7.22475	0.600855	12.6128	-4.89745	11.7136	-5.4983	10.001	0.472367	0.767935
Tyrosine	41.6164	22.0247	34.5268	14.4215	31.775	19.0869	-7.08951	25.7813	-9.84138	29.3661	-2.75186	22.5601	0.753081	0.902702
Valine	182.684	59.2982	169.63	55.1946	189.056	65.8986	-13.0536	85.909	6.37259	80.5361	19.4262	82.8228	0.327048	0.767935
ICT group
ADMA	0.335382	0.289348	0.436448	0.391212			0.101066	0.550958					0.529242	0.842719
Alanine	77.679	102.953	73.6986	103.821			-3.98045	58.4051					0.278561	0.70556
Arginine	73.4245	26.1737	65.1013	31.191			-8.32314	39.5397					0.327581	0.70556
Asparagine	6.84948	8.76313	7.34551	9.3407			0.496035	13.7047					0.530126	0.842719
Aspartic acid	10.0915	8.60942	17.0258	17.0671			6.93428	19.6812					0.327581	0.70556
Betaine	383.886	109.495	326.786	117.51			-57.0992	137.794					0.167725	0.70556
Citruline	16.4874	25.2477	28.1408	26.7699			11.6534	39.5372					0.414307	0.828613
Creatinine	37.7638	23.3973	39.8765	17.6971			2.11275	23.9822					0.861262	0.927513
Gamma-aminobutyric acid	14.7955	7.17585	10.6338	5.71419			-4.1617	8.12005					0.091306	0.70556
Glutamic acid	13.8476	5.75927	13.8858	5.69144			0.0382316	7.51826					0.968664	0.968664
Glutamine	81.3585	129.764	102.752	86.606			21.3931	148.711					0.262911	0.70556
Glycine	51.163	76.8711	38.8335	35.4659			-12.3295	85.9897					0.844519	0.927513
Histidine	29.4557	16.0931	34.1815	24.9979			4.72579	25.6248					0.622765	0.871871
Leucine+Isoleucine	73.3403	31.9384	68.1533	44.1445			-5.18696	60.1661					0.587891	0.866365
Lysine	75.6467	29.821	79.0967	40.5664			3.44996	49.3563					0.861262	0.927513
Methionine	7.56247	6.89428	8.09478	8.59211			0.532313	8.30264					0.75304	0.927513
NMMA	0.233668	0.229958	0.130796	0.146446			-0.102871	0.307527					0.243896	0.70556
1-methyl-histydyne	1.79721	1.60761	1.17119	1.05971			-0.626019	2.11455					0.248307	0.70556
Ornityne	19.5438	15.9361	18.4479	18.4606			-1.09591	23.3529					0.504247	0.842719
Phenylalanine	45.1679	21.5992	46.9106	25.3803			1.74269	21.7399					0.916436	0.950378
Proline	109.656	49.8404	88.0693	58.2835			-21.5866	61.9098					0.0803223	0.70556
SDMA	0.512903	0.315198	0.589006	0.395814			0.0761031	0.517651					0.674893	0.899858
Serine	56.3391	30.3511	41.1855	36.6516			-15.1536	38.6725					0.273438	0.70556
Taurine	5.32527	4.97788	15.4121	23.1949			10.0868	24.7296					0.541748	0.842719
Threonine	63.8625	53.8535	39.3541	31.806			-24.5083	58.3967					0.224015	0.70556
Trypthophan	26.2999	12.5865	27.7864	14.6216			1.48651	14.3458					0.833835	0.927513
Tyrosine	29.3192	14.5318	41.8071	28.8069			12.4879	29.5448					0.167725	0.70556
Valine	164.708	69.1054	215.282	76.8531			50.5737	116.876					0.146484	0.70556
